# Supplementary material
Source: publisher figshare collection journal article supplement (https://tandf.figshare.com/ndownloader/files/16251122)
Supplement: Supplementary file 1 [file 16251122]

## Supplementary data

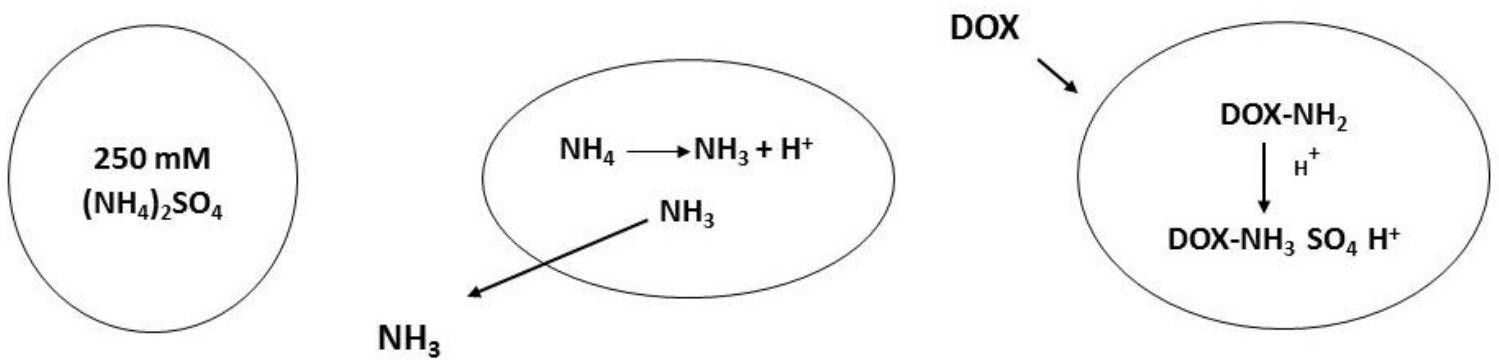

Fig. S1. Schematic illustration of doxorubicin encapsulation into liposomes by the pH gradient method.

**A**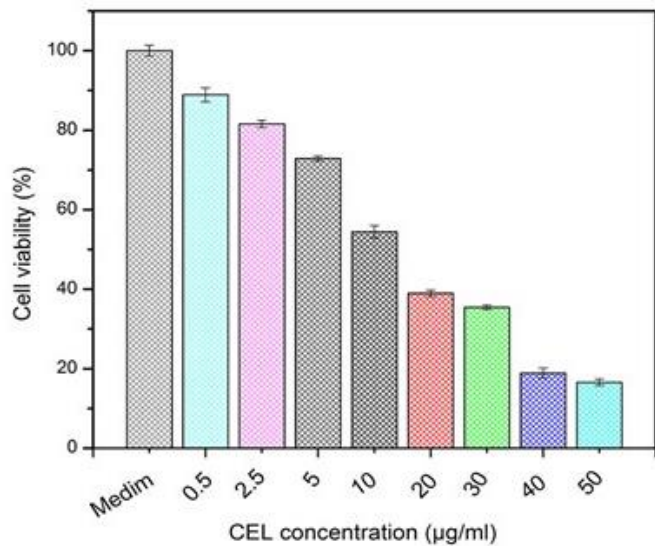**B**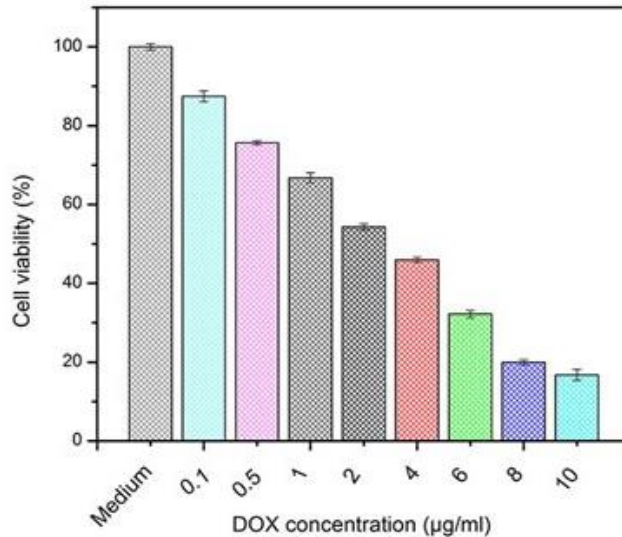**C**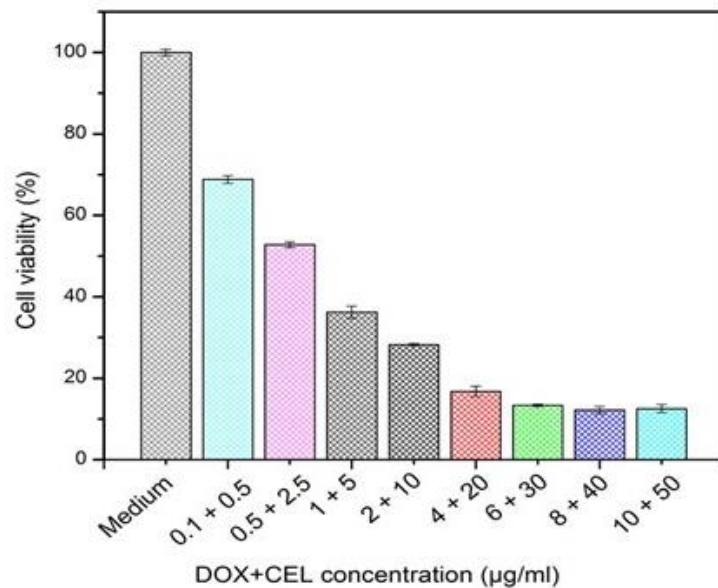

Fig. S2. Dose-dependent B16 cells growth inhibition by CEL solution (A), DOX solution (B), and DOX/CEL solution (C). Data are reported as the mean  $\pm$  standard deviation ( $n = 3$ ).

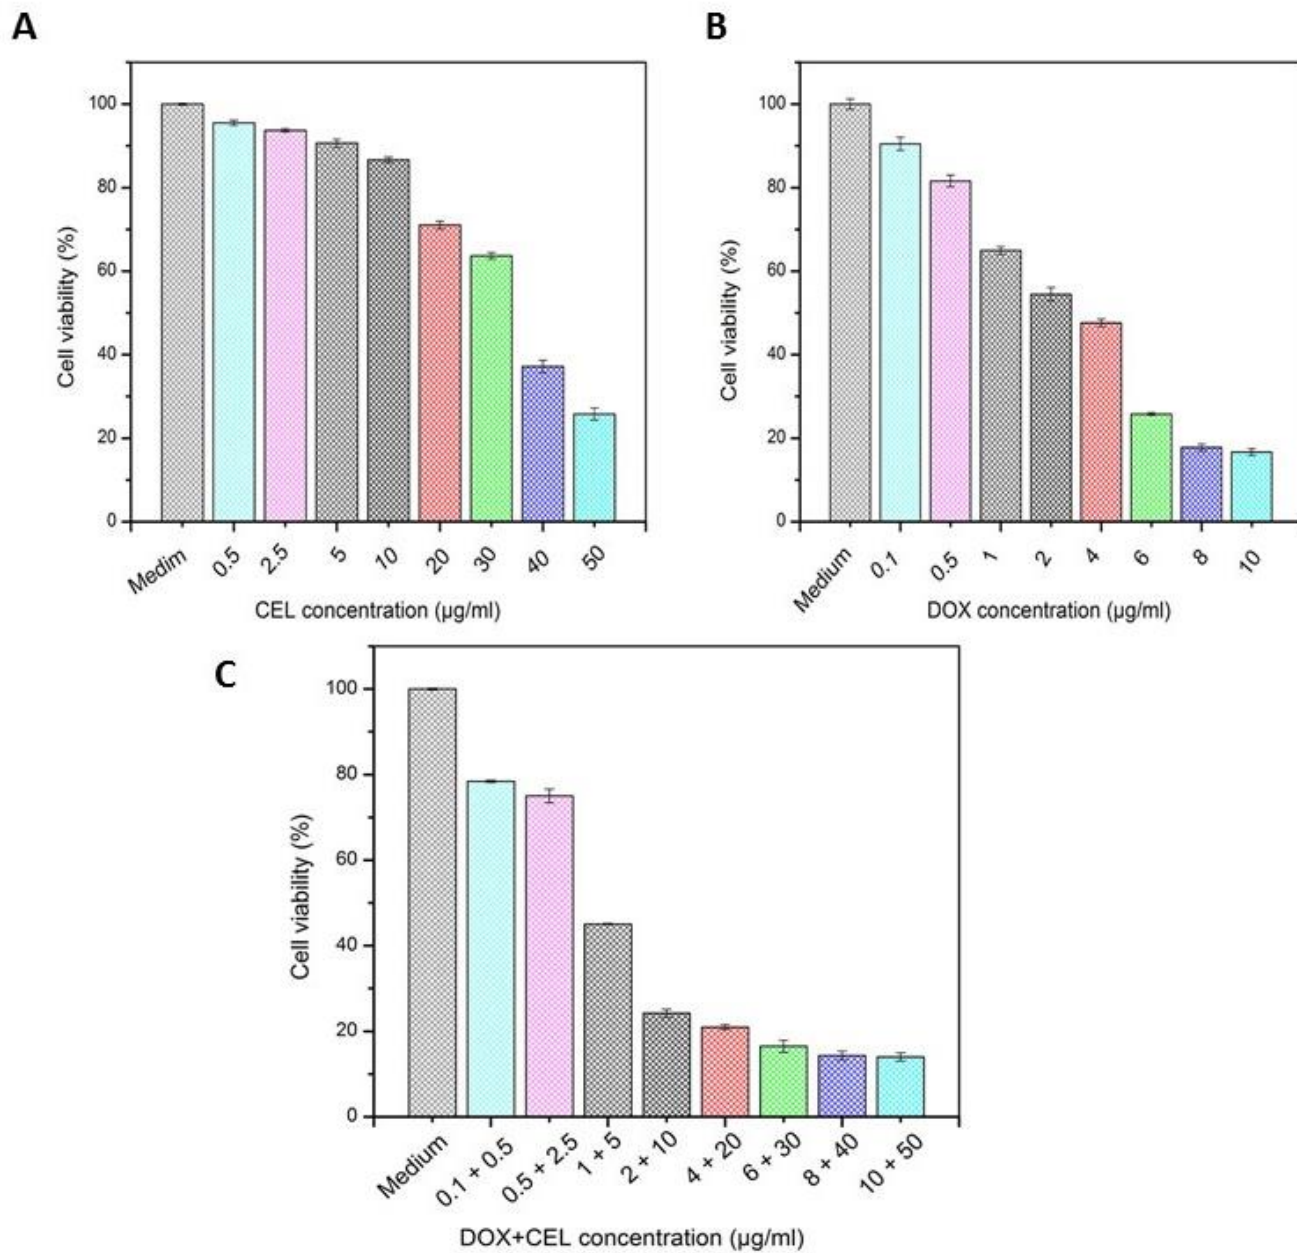

Fig. S3. Dose-dependent MGC80-3 cells growth inhibition by CEL solution (A), DOX solution (B), and DOX/CEL solution (C). Data are reported as the mean  $\pm$  standard deviation ( $n = 3$ ).
